# Supplementary material for: Temperature-responsive crystal dynamic accelerates sieving of propane/propylene mixtures
Source: Research Square preprint supplement (doi:10.21203/rs.3.rs-2941653/v1), 2023-06-16

## checkCIF/PLATON report

Structure factors have been supplied for datablock(s) as

THIS REPORT IS FOR GUIDANCE ONLY. IF USED AS PART OF A REVIEW PROCEDURE FOR PUBLICATION, IT SHOULD NOT REPLACE THE EXPERTISE OF AN EXPERIENCED CRYSTALLOGRAPHIC REFEREE.

No syntax errors found.      CIF dictionary      Interpreting this report

### Datablock: as

---

|                        |                                    |                        |               |
|------------------------|------------------------------------|------------------------|---------------|
| Bond precision:        | C-C = 0.0075 A                     | Wavelength=0.71073     |               |
| Cell:                  | a=11.7160 (5)                      | b=17.4096 (9)          | c=15.4786 (8) |
|                        | alpha=90                           | beta=96.609 (2)        | gamma=90      |
| Temperature:           | 198 K                              |                        |               |
|                        | Calculated                         | Reported               |               |
| Volume                 | 3136.2 (3)                         | 3136.2 (3)             |               |
| Space group            | I 2/a                              | I 2/a                  |               |
| Hall group             | -I 2ya                             | -I 2ya                 |               |
| Moiety formula         | C24 H20 Cu F6 N8 Si [+<br>solvent] | ?                      |               |
| Sum formula            | C24 H20 Cu F6 N8 Si [+<br>solvent] | C24 H20 Cu F6 N8 O0 Si |               |
| Mr                     | 626.12                             | 626.11                 |               |
| Dx, g cm <sup>-3</sup> | 1.326                              | 1.326                  |               |
| Z                      | 4                                  | 4                      |               |
| Mu (mm <sup>-1</sup> ) | 0.796                              | 0.796                  |               |
| F000                   | 1268.0                             | 1268.0                 |               |
| F000'                  | 1270.21                            |                        |               |
| h, k, lmax             | 13, 20, 18                         | 13, 20, 18             |               |
| Nref                   | 2648                               | 2648                   |               |
| Tmin, Tmax             | 0.887, 0.909                       |                        |               |
| Tmin'                  | 0.887                              |                        |               |

Correction method= Not given

Data completeness= 1.000

Theta(max)= 24.598

R(reflections)= 0.0591 ( 2401)

wR2(reflections)=  
0.2619 ( 2648)

S = 1.196

Npar= 184

---

The following ALERTS were generated. Each ALERT has the format

**test-name\_ALERT\_alert-type\_alert-level.**

Click on the hyperlinks for more details of the test.

---

### Alert level B

|                   |     |                                                  |     |       |
|-------------------|-----|--------------------------------------------------|-----|-------|
| PLAT242_ALERT_2_B | Low | 'MainMol' Ueq as Compared to Neighbors of        | Si1 | Check |
| PLAT934_ALERT_3_B |     | Number of (Iobs-Icalc)/Sigma(W) > 10 Outliers .. | 6   | Check |
| PLAT990_ALERT_1_B |     | Deprecated .res/.hkl Input Style SQUEEZE Job ... | !   | Note  |

---

### Alert level C

|                   |                                                            |                                           |        |        |
|-------------------|------------------------------------------------------------|-------------------------------------------|--------|--------|
| THETM01_ALERT_3_C | The value of sine(theta_max)/wavelength is less than 0.590 |                                           |        |        |
|                   | Calculated sin(theta_max)/wavelength = 0.5857              |                                           |        |        |
| PLAT052_ALERT_1_C | Info                                                       | on Absorption Correction Method Not Given | Please | Do !   |
| PLAT084_ALERT_3_C | High                                                       | wR2 Value (i.e. > 0.25) .....             | 0.26   | Report |
| PLAT241_ALERT_2_C | High                                                       | 'MainMol' Ueq as Compared to Neighbors of | F1     | Check  |
| PLAT241_ALERT_2_C | High                                                       | 'MainMol' Ueq as Compared to Neighbors of | C8     | Check  |
| PLAT341_ALERT_3_C | Low                                                        | Bond Precision on C-C Bonds .....         | 0.0075 | Ang.   |
| PLAT906_ALERT_3_C | Large                                                      | K Value in the Analysis of Variance ..... | 4.284  | Check  |

---

### Alert level G

CELLZ01\_ALERT\_1\_G Difference between formula and atom\_site contents detected.

CELLZ01\_ALERT\_1\_G ALERT: Large difference may be due to a

symmetry error - see SYMMG tests

From the CIF: \_cell\_formula\_units\_Z 4

From the CIF: \_chemical\_formula\_sum C24 H20 Cu F6 N8 O0 Si

TEST: Compare cell contents of formula and atom\_site data

| atom | Z*formula | cif sites | diff |
|------|-----------|-----------|------|
| C    | 96.00     | 96.00     | 0.00 |
| H    | 80.00     | 80.00     | 0.00 |
| Cu   | 4.00      | 4.00      | 0.00 |
| F    | 24.00     | 24.00     | 0.00 |
| N    | 32.00     | 32.00     | 0.00 |
| O    | 4.00      | 0.00      | 4.00 |
| Si   | 4.00      | 4.00      | 0.00 |

|                   |                                                  |        |        |
|-------------------|--------------------------------------------------|--------|--------|
| PLAT003_ALERT_2_G | Number of Uiso or Uij Restrained non-H Atoms ... | 22     | Report |
| PLAT004_ALERT_5_G | Polymeric Structure Found with Maximum Dimension | 3      | Info   |
| PLAT177_ALERT_4_G | The CIF-Embedded .res File Contains DELU Records | 1      | Report |
| PLAT178_ALERT_4_G | The CIF-Embedded .res File Contains SIMU Records | 1      | Report |
| PLAT186_ALERT_4_G | The CIF-Embedded .res File Contains ISOR Records | 1      | Report |
| PLAT188_ALERT_3_G | A Non-default SIMU Restraint Value has been used | 0.0100 | Report |
| PLAT192_ALERT_3_G | A Non-default DELU Restraint Value for SecondPar | 0.0200 | Report |
| PLAT605_ALERT_4_G | Largest Solvent Accessible VOID in the Structure | 443    | A**3   |
| PLAT794_ALERT_5_G | Tentative Bond Valency for Cu1 (II) .            | 2.19   | Info   |
| PLAT860_ALERT_3_G | Number of Least-Squares Restraints .....         | 309    | Note   |
| PLAT869_ALERT_4_G | ALERTS Related to the Use of SQUEEZE Suppressed  | !      | Info   |
| PLAT883_ALERT_1_G | No Info/Value for _atom_sites_solution_primary . | Please | Do !   |
| PLAT899_ALERT_4_G | SHELXL2018 is Deprecated and Succeeded by SHELXL | 2019/3 | Note   |
| PLAT909_ALERT_3_G | Percentage of I>2sig(I) Data at Theta(Max) Still | 80%    | Note   |
| PLAT910_ALERT_3_G | Missing # of FCF Reflection(s) Below Theta(Min). | 1      | Note   |
| PLAT961_ALERT_5_G | Dataset Contains no Negative Intensities .....   | Please | Check  |
| PLAT965_ALERT_2_G | The SHELXL WEIGHT Optimisation has not Converged | Please | Check  |

PLAT967\_ALERT\_5\_G Note: Two-Theta Cutoff Value in Embedded .res .. 49.2 Degree  
PLAT978\_ALERT\_2\_G Number C-C Bonds with Positive Residual Density. 1 Info

---

0 **ALERT level A** = Most likely a serious problem - resolve or explain  
3 **ALERT level B** = A potentially serious problem, consider carefully  
7 **ALERT level C** = Check. Ensure it is not caused by an omission or oversight  
21 **ALERT level G** = General information/check it is not something unexpected

5 ALERT type 1 CIF construction/syntax error, inconsistent or missing data  
6 ALERT type 2 Indicator that the structure model may be wrong or deficient  
10 ALERT type 3 Indicator that the structure quality may be low  
6 ALERT type 4 Improvement, methodology, query or suggestion  
4 ALERT type 5 Informative message, check

---

It is advisable to attempt to resolve as many as possible of the alerts in all categories. Often the minor alerts point to easily fixed oversights, errors and omissions in your CIF or refinement strategy, so attention to these fine details can be worthwhile. In order to resolve some of the more serious problems it may be necessary to carry out additional measurements or structure refinements. However, the purpose of your study may justify the reported deviations and the more serious of these should normally be commented upon in the discussion or experimental section of a paper or in the "special\_details" fields of the CIF. checkCIF was carefully designed to identify outliers and unusual parameters, but every test has its limitations and alerts that are not important in a particular case may appear. Conversely, the absence of alerts does not guarantee there are no aspects of the results needing attention. It is up to the individual to critically assess their own results and, if necessary, seek expert advice.

### Publication of your CIF in IUCr journals

A basic structural check has been run on your CIF. These basic checks will be run on all CIFs submitted for publication in IUCr journals (*Acta Crystallographica*, *Journal of Applied Crystallography*, *Journal of Synchrotron Radiation*); however, if you intend to submit to *Acta Crystallographica Section C* or *E* or *IUCrData*, you should make sure that full publication checks are run on the final version of your CIF prior to submission.

### Publication of your CIF in other journals

Please refer to the *Notes for Authors* of the relevant journal for any special instructions relating to CIF submission.

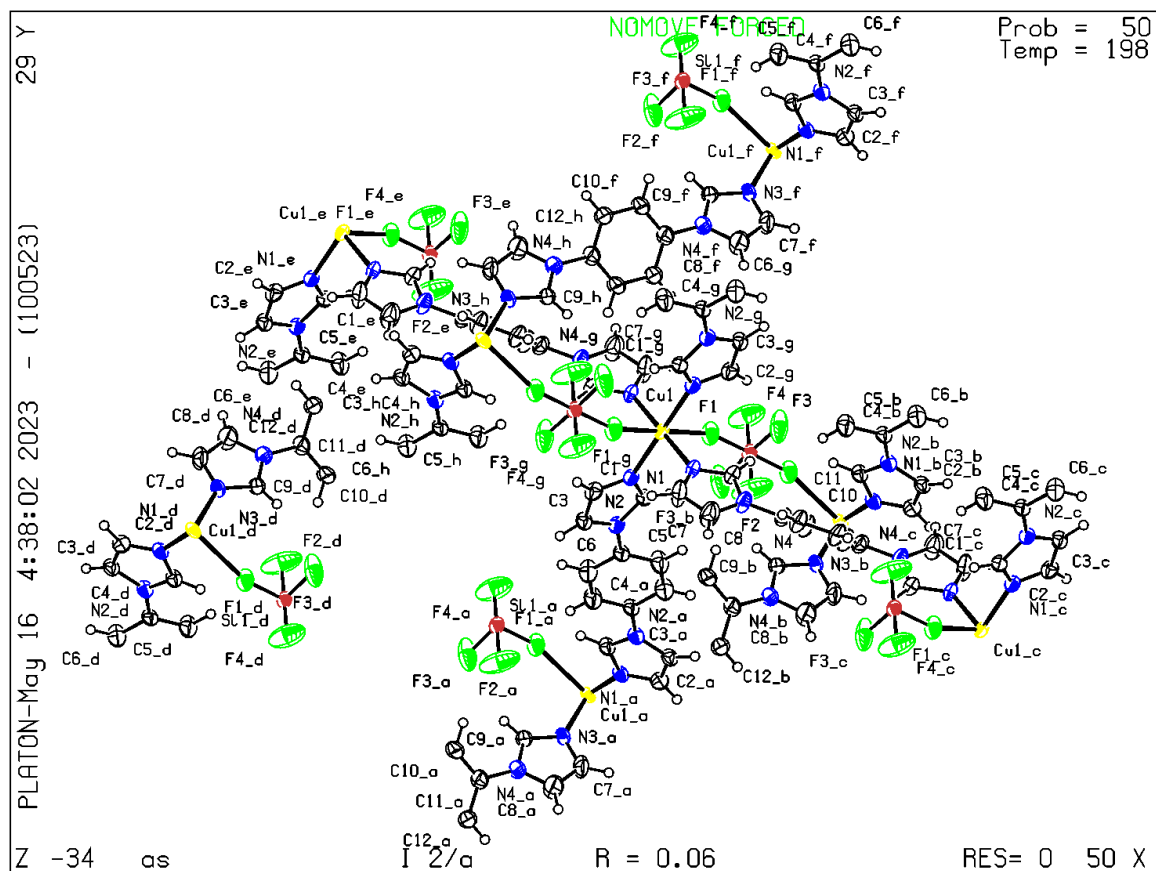

Supplement: Supplementary file 1 [file 06fc8faa412d0c3ca1fe8344.pdf]
