# Supplementary material for: Temperature-responsive crystal dynamic accelerates sieving of propane/propylene mixtures
Source: Research Square preprint supplement (doi:10.21203/rs.3.rs-2941653/v1), 2023-06-16

|                                |                                    |                                     |                |
|--------------------------------|------------------------------------|-------------------------------------|----------------|
| Bond precision:                | C-C = 0.0084 Å                     | Wavelength=0.71073                  |                |
| Cell:                          | a=11.7029 (8)                      | b=17.5396 (13)                      | c=15.4949 (16) |
|                                | alpha=90                           | beta=96.500 (2)                     | gamma=90       |
| Temperature:                   | 308 K                              |                                     |                |
|                                | Calculated                         | Reported                            |                |
| Volume                         | 3160.1 (5)                         | 3160.1 (5)                          |                |
| Space group                    | I 2/c                              | I2/c                                |                |
| Hall group                     | -I 2yc                             | -I2yc                               |                |
| Moiety formula                 | C24 H20 Cu F6 N8 Si [+<br>solvent] | ?                                   |                |
| Sum formula                    | C24 H20 Cu F6 N8 Si [+<br>solvent] | C24 H20 Cu F6 N8 Si                 |                |
| Mr                             | 626.12                             | 626.11                              |                |
| Dx, g cm-3                     | 1.316                              | 1.316                               |                |
| Z                              | 4                                  | 4                                   |                |
| Mu (mm-1)                      | 0.790                              | 0.790                               |                |
| F000                           | 1268.0                             | 1268.0                              |                |
| F000'                          | 1270.21                            |                                     |                |
| h,k,lmax                       | 13,20,18                           | 13,20,18                            |                |
| Nref                           | 2793                               | 2793                                |                |
| Tmin,Tmax                      | 0.888,0.910                        |                                     |                |
| Tmin'                          | 0.888                              |                                     |                |
| Correction method= Not given   |                                    |                                     |                |
| Data completeness= 1.000       |                                    | Theta(max)= 25.048                  |                |
| R(reflections)= 0.0766 ( 2369) |                                    | wR2(reflections)=<br>0.2060 ( 2793) |                |
| S = 1.056                      | Npar= 184                          |                                     |                |

---

The following ALERTS were generated. Each ALERT has the format

**test-name\_ALERT\_alert-type\_alert-level.**

Click on the hyperlinks for more details of the test.

---

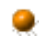

#### Alert level B

|                   |            |                                           |     |       |
|-------------------|------------|-------------------------------------------|-----|-------|
| PLAT242_ALERT_2_B | Low        | 'MainMol' Ueq as Compared to Neighbors of | Si1 | Check |
| PLAT990_ALERT_1_B | Deprecated | .res/.hkl Input Style SQUEEZE Job ...     | !   | Note  |

---

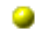

#### Alert level C

|                   |                                      |                                           |         |       |
|-------------------|--------------------------------------|-------------------------------------------|---------|-------|
| PLAT052_ALERT_1_C | Info on Absorption Correction Method | Not Given                                 | Please  | Do !  |
| PLAT241_ALERT_2_C | High                                 | 'MainMol' Ueq as Compared to Neighbors of | F1      | Check |
| PLAT334_ALERT_2_C | Small <C-C> Benzene Dist.            | C10 -C12_a                                | 1.37    | Ang.  |
| PLAT341_ALERT_3_C | Low Bond Precision on                | C-C Bonds .....                           | 0.00838 | Ang.  |

---

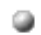

#### Alert level G

|                   |                                                  |        |        |
|-------------------|--------------------------------------------------|--------|--------|
| PLAT003_ALERT_2_G | Number of Uiso or Uij Restrained non-H Atoms ... | 22     | Report |
| PLAT004_ALERT_5_G | Polymeric Structure Found with Maximum Dimension | 3      | Info   |
| PLAT083_ALERT_2_G | SHELXL Second Parameter in WGHT Unusually Large  | 24.86  | Why ?  |
| PLAT177_ALERT_4_G | The CIF-Embedded .res File Contains DELU Records | 1      | Report |
| PLAT178_ALERT_4_G | The CIF-Embedded .res File Contains SIMU Records | 1      | Report |
| PLAT186_ALERT_4_G | The CIF-Embedded .res File Contains ISOR Records | 1      | Report |
| PLAT605_ALERT_4_G | Largest Solvent Accessible VOID in the Structure | 454    | A**3   |
| PLAT794_ALERT_5_G | Tentative Bond Valency for Cu1 (II)              | 2.18   | Info   |
| PLAT860_ALERT_3_G | Number of Least-Squares Restraints .....         | 309    | Note   |
| PLAT869_ALERT_4_G | ALERTS Related to the Use of SQUEEZE Suppressed  | !      | Info   |
| PLAT883_ALERT_1_G | No Info/Value for _atom_sites_solution_primary   | Please | Do !   |
| PLAT965_ALERT_2_G | The SHELXL WEIGHT Optimisation has not Converged | Please | Check  |
| PLAT967_ALERT_5_G | Note: Two-Theta Cutoff Value in Embedded .res .. | 50.1   | Degree |

---

- 0 **ALERT level A** = Most likely a serious problem - resolve or explain  
2 **ALERT level B** = A potentially serious problem, consider carefully  
4 **ALERT level C** = Check. Ensure it is not caused by an omission or oversight  
13 **ALERT level G** = General information/check it is not something unexpected

- 3 ALERT type 1 CIF construction/syntax error, inconsistent or missing data  
6 ALERT type 2 Indicator that the structure model may be wrong or deficient  
2 ALERT type 3 Indicator that the structure quality may be low  
5 ALERT type 4 Improvement, methodology, query or suggestion  
3 ALERT type 5 Informative message, check
- 
-

It is advisable to attempt to resolve as many as possible of the alerts in all categories. Often the minor alerts point to easily fixed oversights, errors and omissions in your CIF or refinement strategy, so attention to these fine details can be worthwhile. In order to resolve some of the more serious problems it may be necessary to carry out additional measurements or structure refinements. However, the purpose of your study may justify the reported deviations and the more serious of these should normally be commented upon in the discussion or experimental section of a paper or in the "special\_details" fields of the CIF. checkCIF was carefully designed to identify outliers and unusual parameters, but every test has its limitations and alerts that are not important in a particular case may appear. Conversely, the absence of alerts does not guarantee there are no aspects of the results needing attention. It is up to the individual to critically assess their own results and, if necessary, seek expert advice.

### **Publication of your CIF in IUCr journals**

A basic structural check has been run on your CIF. These basic checks will be run on all CIFs submitted for publication in IUCr journals (*Acta Crystallographica*, *Journal of Applied Crystallography*, *Journal of Synchrotron Radiation*); however, if you intend to submit to *Acta Crystallographica Section C* or *E* or *IUCrData*, you should make sure that full publication checks are run on the final version of your CIF prior to submission.

### **Publication of your CIF in other journals**

Please refer to the *Notes for Authors* of the relevant journal for any special instructions relating to CIF submission.

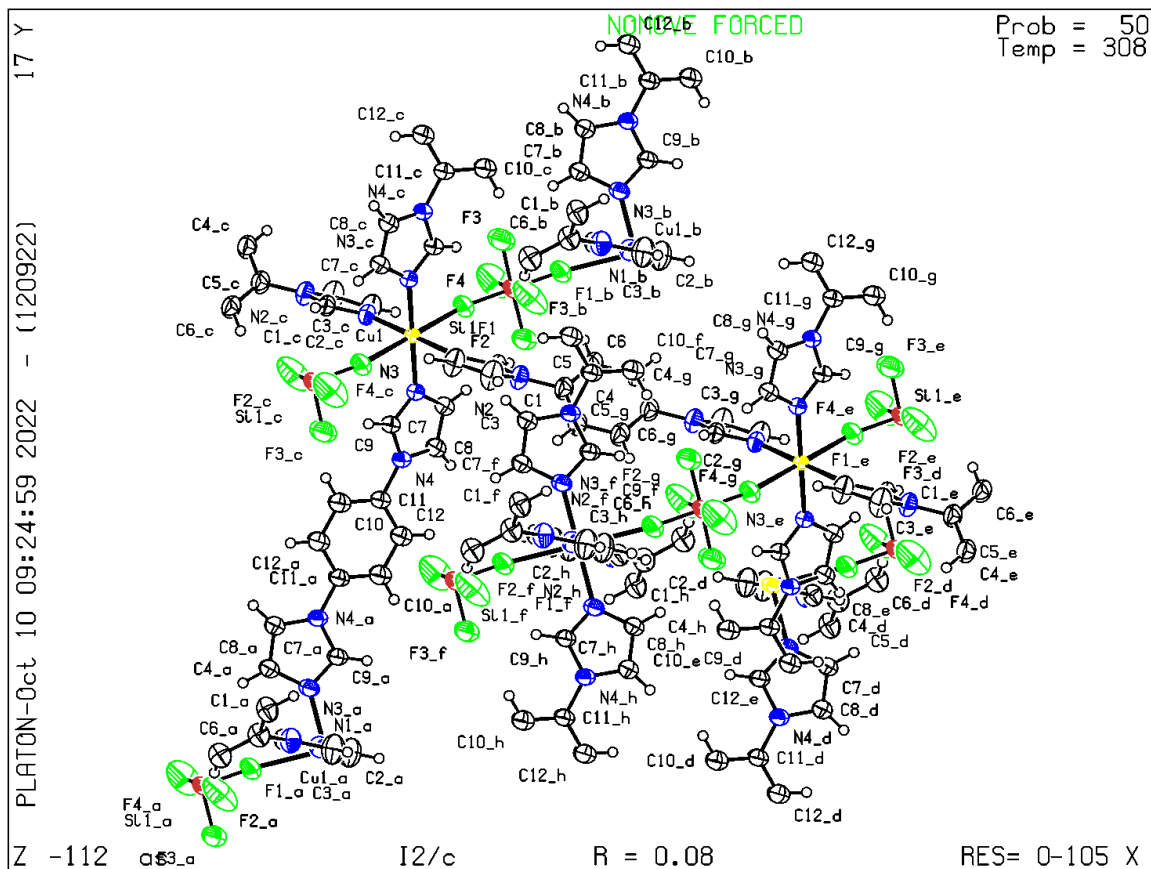

Supplement: Supplementary file 7 [file 834b64a845616d91d16a65cc.pdf]
