# Supplementary material for: Temperature-responsive crystal dynamic accelerates sieving of propane/propylene mixtures
Source: Research Square preprint supplement (doi:10.21203/rs.3.rs-2941653/v1), 2023-06-16

## checkCIF/PLATON report

Structure factors have been supplied for datablock(s) b

THIS REPORT IS FOR GUIDANCE ONLY. IF USED AS PART OF A REVIEW PROCEDURE FOR PUBLICATION, IT SHOULD NOT REPLACE THE EXPERTISE OF AN EXPERIENCED CRYSTALLOGRAPHIC REFEREE.

No syntax errors found.      CIF dictionary      Interpreting this report

### Datablock: b

---

Bond precision:      C-C = 0.0071 Å      Wavelength=0.71073

Cell:                      a=11.6529 (7)      b=17.5398 (10)      c=15.5802 (9)  
                                alpha=90      beta=96.327 (4)      gamma=90

Temperature:              296 K

|                                     | Calculated                                                                                                     | Reported                                                           |
|-------------------------------------|----------------------------------------------------------------------------------------------------------------|--------------------------------------------------------------------|
| Volume                              | 3165.0 (3)                                                                                                     | 3165.0 (3)                                                         |
| Space group                         | I 2/c                                                                                                          | I 2/c                                                              |
| Hall group                          | -I 2yc                                                                                                         | -I 2yc                                                             |
| Moiety formula                      | C <sub>24</sub> H <sub>20</sub> Cu F <sub>6</sub> N <sub>8</sub> Si,<br>0.668 (C <sub>3</sub> H <sub>8</sub> ) | ?                                                                  |
| Sum formula                         | C <sub>26</sub> H <sub>25.34</sub> Cu F <sub>6</sub> N <sub>8</sub> Si                                         | C <sub>26</sub> H <sub>0</sub> Cu F <sub>6</sub> N <sub>8</sub> Si |
| Mr                                  | 655.57                                                                                                         | 655.70                                                             |
| D <sub>x</sub> , g cm <sup>-3</sup> | 1.376                                                                                                          | 1.322                                                              |
| Z                                   | 4                                                                                                              | 4                                                                  |
| Mu (mm <sup>-1</sup> )              | 0.793                                                                                                          | 0.790                                                              |
| F <sub>000</sub>                    | 1337.5                                                                                                         | 1236.0                                                             |
| F <sub>000</sub> '                  | 1339.70                                                                                                        |                                                                    |
| h, k, l <sub>max</sub>              | 13, 20, 18                                                                                                     | 13, 20, 18                                                         |
| N <sub>ref</sub>                    | 2779                                                                                                           | 2727                                                               |
| T <sub>min</sub> , T <sub>max</sub> |                                                                                                                |                                                                    |
| T <sub>min</sub> '                  |                                                                                                                |                                                                    |

Correction method= Not given

Data completeness= 0.981      Theta (max)= 24.997

R (reflections)= 0.0657 ( 2297)      wR<sub>2</sub> (reflections)=  
S = 1.054      N<sub>par</sub>= 215      0.2099 ( 2727)



---

The following ALERTS were generated. Each ALERT has the format

**test-name\_ALERT\_alert-type\_alert-level.**

Click on the hyperlinks for more details of the test.

---

### Alert level B

PLAT242\_ALERT\_2\_B Low 'MainMol' Ueq as Compared to Neighbors of Si1 Check

**Author Response: These alerts are generated because there is disorder in the structure**

---

### Alert level C

CHEMW01\_ALERT\_1\_C The ratio of given/expected molecular weight as calculated from the \_chemical\_formula\_sum lies outside the range 0.99 <> 1.01  
Calculated formula weight = 629.9620  
Formula weight given = 655.7000

DENSD01\_ALERT\_1\_C The ratio of the submitted crystal density and that calculated from the formula is outside the range 0.99 <> 1.01  
Crystal density given = 1.322  
Calculated crystal density = 1.376

PLAT041\_ALERT\_1\_C Calc. and Reported SumFormula Strings Differ Please Check

PLAT046\_ALERT\_1\_C Reported Z, MW and D(calc) are Inconsistent .... 1.376 Check

PLAT052\_ALERT\_1\_C Info on Absorption Correction Method Not Given Please Do !

PLAT053\_ALERT\_1\_C Minimum Crystal Dimension Missing (or Error) ... Please Check

PLAT054\_ALERT\_1\_C Medium Crystal Dimension Missing (or Error) ... Please Check

PLAT055\_ALERT\_1\_C Maximum Crystal Dimension Missing (or Error) ... Please Check

PLAT068\_ALERT\_1\_C Reported F000 Differs from Calcd (or Missing)... Please Check

PLAT213\_ALERT\_2\_C Atom F4 has ADP max/min Ratio ..... 3.4 prolat

PLAT220\_ALERT\_2\_C NonSolvent Resd 1 C Ueq(max)/Ueq(min) Range 3.1 Ratio

PLAT241\_ALERT\_2\_C High 'MainMol' Ueq as Compared to Neighbors of F3 Check

PLAT241\_ALERT\_2\_C High 'MainMol' Ueq as Compared to Neighbors of C9 Check

PLAT242\_ALERT\_2\_C Low 'MainMol' Ueq as Compared to Neighbors of Cu1 Check

**Author Response: These alerts are generated because there is disorder in the structure**

PLAT242\_ALERT\_2\_C Low 'MainMol' Ueq as Compared to Neighbors of C5 Check

**Author Response: These alerts are generated because there is disorder in the structure**

PLAT334\_ALERT\_2\_C Small <C-C> Benzene Dist. C4 -C6\_b . 1.37 Ang.

PLAT341\_ALERT\_3\_C Low Bond Precision on C-C Bonds ..... 0.00712 Ang.

PLAT911\_ALERT\_3\_C Missing FCF Refl Between Thmin & STh/L= 0.595 52 Report

---

### Alert level G

FORMU01\_ALERT\_2\_G There is a discrepancy between the atom counts in the \_chemical\_formula\_sum and the formula from the \_atom\_site\* data.  
Atom count from \_chemical\_formula\_sum: C26 Cu1 F6 N8 Si1  
Atom count from the \_atom\_site data: C26.004 H25.34399 Cu1 F6 N8 Si1



CELLZ01\_ALERT\_1\_G Difference between formula and atom\_site contents detected.

CELLZ01\_ALERT\_1\_G ALERT: Large difference may be due to a

symmetry error - see SYMMG tests

From the CIF: \_cell\_formula\_units\_Z 4

From the CIF: \_chemical\_formula\_sum C26 H0 Cu F6 N8 Si

TEST: Compare cell contents of formula and atom\_site data

| atom | Z*formula | cif sites | diff   |
|------|-----------|-----------|--------|
| C    | 104.00    | 104.02    | -0.02  |
| H    | 4.00      | 101.38    | -97.38 |
| Cu   | 4.00      | 4.00      | 0.00   |
| F    | 24.00     | 24.00     | 0.00   |
| N    | 32.00     | 32.00     | 0.00   |
| Si   | 4.00      | 4.00      | 0.00   |

|                   |                                                  |        |        |
|-------------------|--------------------------------------------------|--------|--------|
| PLAT002_ALERT_2_G | Number of Distance or Angle Restraints on AtSite | 6      | Note   |
| PLAT003_ALERT_2_G | Number of Uiso or Uij Restrained non-H Atoms ... | 2      | Report |
| PLAT004_ALERT_5_G | Polymeric Structure Found with Maximum Dimension | 3      | Info   |
| PLAT171_ALERT_4_G | The CIF-Embedded .res File Contains EADP Records | 4      | Report |
| PLAT172_ALERT_4_G | The CIF-Embedded .res File Contains DFIX Records | 4      | Report |
| PLAT186_ALERT_4_G | The CIF-Embedded .res File Contains ISOR Records | 1      | Report |
| PLAT302_ALERT_4_G | Anion/Solvent/Minor-Residue Disorder (Resd 2 )   | 100%   | Note   |
| PLAT302_ALERT_4_G | Anion/Solvent/Minor-Residue Disorder (Resd 3 )   | 100%   | Note   |
| PLAT411_ALERT_2_G | Short Inter H...H Contact H2 ..H15B .            | 2.14   | Ang.   |
|                   | -1/2+x,1/2-y,z =                                 | 8_455  | Check  |
| PLAT413_ALERT_2_G | Short Inter XH3 .. XHn H3 ..H19A .               | 1.93   | Ang.   |
|                   | 3/2-x,1/2-y,1/2-z =                              | 7_655  | Check  |
| PLAT413_ALERT_2_G | Short Inter XH3 .. XHn H8 ..H14C .               | 1.76   | Ang.   |
|                   | 1-x,1-y,1-z =                                    | 5_666  | Check  |
| PLAT432_ALERT_2_G | Short Inter X...Y Contact F1 ..C14 .             | 2.48   | Ang.   |
|                   | -1+x,-1+y,z =                                    | 1_445  | Check  |
| PLAT432_ALERT_2_G | Short Inter X...Y Contact F1 ..C14 .             | 2.48   | Ang.   |
|                   | 1-x,-1+y,1/2-z =                                 | 2_645  | Check  |
| PLAT432_ALERT_2_G | Short Inter X...Y Contact F2 ..C16 .             | 2.47   | Ang.   |
|                   | 1/2-x,1/2-y,1/2-z =                              | 7_555  | Check  |
| PLAT432_ALERT_2_G | Short Inter X...Y Contact F2 ..C15 .             | 2.94   | Ang.   |
|                   | 1/2-x,1/2-y,1/2-z =                              | 7_555  | Check  |
| PLAT432_ALERT_2_G | Short Inter X...Y Contact F2 ..C17 .             | 2.95   | Ang.   |
|                   | 1/2-x,1/2-y,1/2-z =                              | 7_555  | Check  |
| PLAT721_ALERT_1_G | Bond Calc 0.97000, Rep 0.96000 Dev...            | 0.01   | Ang.   |
|                   | C16 -H16C 1_555 1_555 .....                      | # 43   | Check  |
| PLAT794_ALERT_5_G | Tentative Bond Valency for Cu1 (II)              | 2.16   | Info   |
| PLAT802_ALERT_4_G | CIF Input Record(s) with more than 80 Characters | 1      | Info   |
| PLAT860_ALERT_3_G | Number of Least-Squares Restraints .....         | 20     | Note   |
| PLAT883_ALERT_1_G | No Info/Value for _atom_sites_solution_primary . | Please | Do !   |
| PLAT909_ALERT_3_G | Percentage of I>2sig(I) Data at Theta(Max) Still | 69%    | Note   |
| PLAT910_ALERT_3_G | Missing # of FCF Reflection(s) Below Theta(Min). | 1      | Note   |
| PLAT933_ALERT_2_G | Number of HKL-OMIT Records in Embedded .res File | 50     | Note   |
| PLAT941_ALERT_3_G | Average HKL Measurement Multiplicity .....       | 4.1    | Low    |
| PLAT965_ALERT_2_G | The SHELXL WEIGHT Optimisation has not Converged | Please | Check  |
| PLAT967_ALERT_5_G | Note: Two-Theta Cutoff Value in Embedded .res .. | 50.0   | Degree |
| PLAT978_ALERT_2_G | Number C-C Bonds with Positive Residual Density. | 3      | Info   |

---

0 **ALERT level A** = Most likely a serious problem - resolve or explain

1 **ALERT level B** = A potentially serious problem, consider carefully

18 **ALERT level C** = Check. Ensure it is not caused by an omission or oversight

31 **ALERT level G** = General information/check it is not something unexpected



13 ALERT type 1 CIF construction/syntax error, inconsistent or missing data  
22 ALERT type 2 Indicator that the structure model may be wrong or deficient  
6 ALERT type 3 Indicator that the structure quality may be low  
6 ALERT type 4 Improvement, methodology, query or suggestion  
3 ALERT type 5 Informative message, check

---

It is advisable to attempt to resolve as many as possible of the alerts in all categories. Often the minor alerts point to easily fixed oversights, errors and omissions in your CIF or refinement strategy, so attention to these fine details can be worthwhile. In order to resolve some of the more serious problems it may be necessary to carry out additional measurements or structure refinements. However, the purpose of your study may justify the reported deviations and the more serious of these should normally be commented upon in the discussion or experimental section of a paper or in the "special\_details" fields of the CIF. checkCIF was carefully designed to identify outliers and unusual parameters, but every test has its limitations and alerts that are not important in a particular case may appear. Conversely, the absence of alerts does not guarantee there are no aspects of the results needing attention. It is up to the individual to critically assess their own results and, if necessary, seek expert advice.

### **Publication of your CIF in IUCr journals**

A basic structural check has been run on your CIF. These basic checks will be run on all CIFs submitted for publication in IUCr journals (*Acta Crystallographica*, *Journal of Applied Crystallography*, *Journal of Synchrotron Radiation*); however, if you intend to submit to *Acta Crystallographica Section C* or *E* or *IUCrData*, you should make sure that full publication checks are run on the final version of your CIF prior to submission.

### **Publication of your CIF in other journals**

Please refer to the *Notes for Authors* of the relevant journal for any special instructions relating to CIF submission.

---



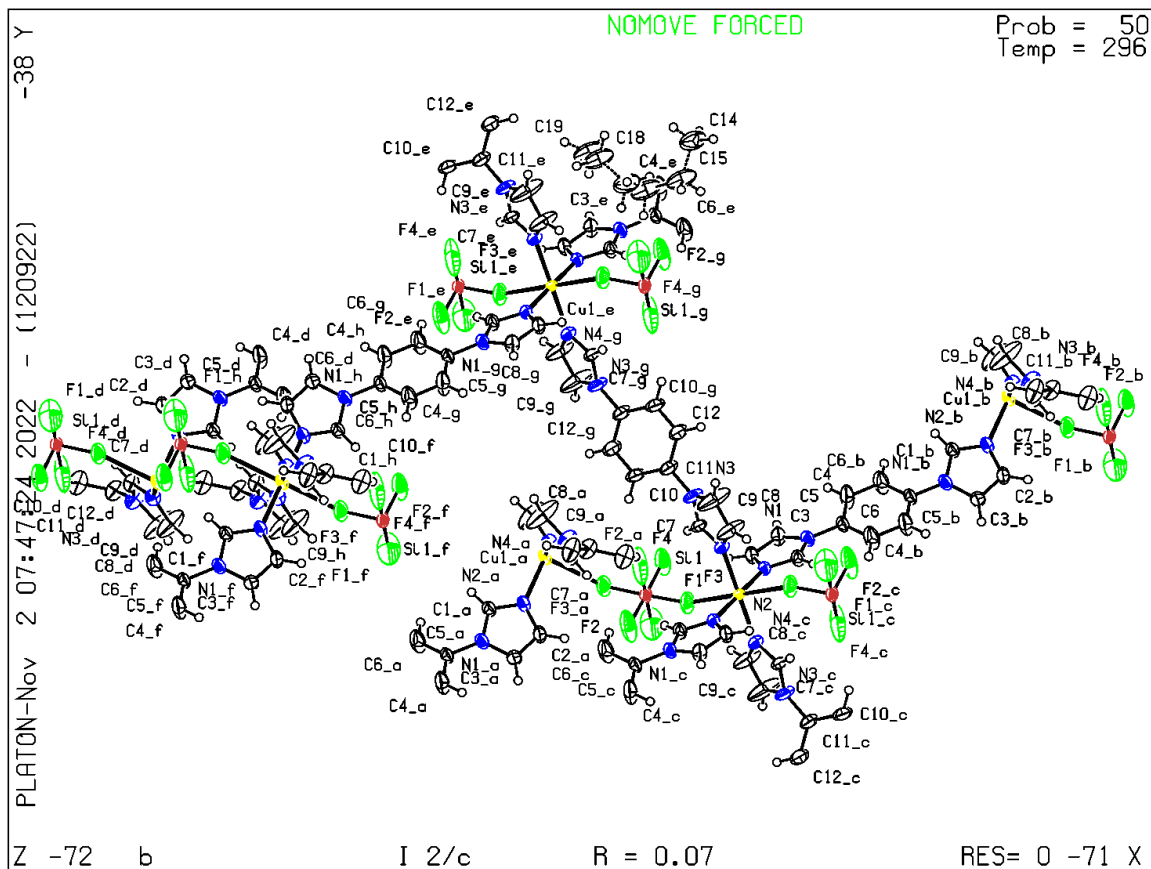

Supplement: Supplementary file 2 [file 41819a51a365bb94bbf9e942.pdf]
